# Supplementary material
Source: publisher site journal article supplement (https://www.dovepress.com/get_supplementary_file.php?f=444631.docx)
Supplement: Supplementary file 1 [file get_supplementary_file.php]

**Table S1** Detailed search strategy

| **Database** | **Search Keywords** | **Results** |
| --- | --- | --- |
| Pubmed | （1）(metacognition* OR self-regulation learning), **10,078**  （2）(“physical activity”OR “physical education” OR“physical exercise” OR “sport”),**328,341** （3）（qualitative study OR observational study OR interview study）646,697 （4）(1) AND (2) AND (3),**18** | 20 |
| Web of Science | （1）Ts = (“metacognition*”OR "self-regulation learning"), **17,435**  （2）Ts = (“physical activity”OR “physical education” OR“physical exercise” OR “sport”), **502,596**  （3）Ts = (qualitative study OR observational study OR interview study), **1,140,620**  （4）(1) AND (2) AND (3), **6** | 18 |
| [SPORTDiscus](javascript:__doPostBack('ctl00$ctl00$MainContentArea$MainContentArea$SelectDbControl$dbList$ctl19$ctl00$titleLink','')) | （1）KW= "metacognition*" OR "self-regulation learning", 154  （2）KW= “physical activity” OR “physical education” OR “physical exercise” OR “sport”, **570,857**  （3）KW=“qualitative study” OR “observational study” OR “interview study”,**394**  （4）(1) AND (2) AND (3), **18** | 18 |
| Scopus | ( TITLE-ABS-KEY (metacognition* OR self-regulation learning) AND (physical activity OR physical education OR physical exercise OR sport) AND (observation study OR interview study OR qualitative study)**,9** | 9 |
| Proquest | （1）Subject (metacognition* OR self-regulation learning),**29000**  （2）subject (physical activity OR physical education OR physical exercise OR sport ) ,**8,437,409**  （3）subject (observation study OR interview study OR qualitative study),**158,177**  （4）(1) AND (2) AND (3)，**7** | 7 |

**Table S2**  PRISMA-2020-checklist

| **Section and**  **Topic** | **Item #** | **Checklist item** |
| --- | --- | --- |
| **TITLE** | | |
| Title | 1 | Identify the report as a systematic review. |
| **ABSTRACT** | | |
| Abstract | 2 | See the PRISMA 2020 for Abstracts checklist. |
| **INTRODUCTION** | | |
| Rationale | 3 | Describe the rationale for the review in the context of existing knowledge. |
| Objectives | 4 | Provide an explicit statement of the objective(s) or question(s) the review addresses. |
| **METHODS** | | |
| Eligibility criteria | 5 | Specify the inclusion and exclusion criteria for the review and how studies were grouped for the syntheses. |
| Information sources | 6 | Specify all databases, registers, websites, organisations, reference lists and other sources searched or consulted to identify studies. Specify the date when each source was last searched or consulted. |
| Search strategy | 7 | Present the full search strategies for all databases, registers and websites, including any filters and limits used. |
| Selection process | 8 | Specify the methods used to decide whether a study met the inclusion criteria of the review, including how many reviewers screened each record and each report retrieved, whether they worked independently, and if applicable, details of automation tools used in the process. |
| Data collection  process | 9 | Specify the methods used to collect data from reports, including how many reviewers collected data from each report, whether they worked  independently, any processes for obtaining or confirming data from study investigators, and if applicable, details of automation tools used in the process. |
| Data items | 10a | List and define all outcomes for which data were sought. Specify whether all results that were compatible with each outcome domain in each study were sought (e.g. for all measures, time points, analyses), and if not, the methods used to decide which results to collect. |
| 10b | List and define all other variables for which data were sought (e.g. participant and intervention characteristics, funding sources). Describe any assumptions made about any missing or unclear information. |
| Study risk of bias assessment | 11 | Specify the methods used to assess risk of bias in the included studies, including details of the tool(s) used, how many reviewers assessed each study and whether they worked independently, and if applicable, details of automation tools used in the process. |
| Effect measures | 12 | Specify for each outcome the effect measure(s) (e.g. risk ratio, mean difference) used in the synthesis or presentation of results. |
| Synthesis  methods | 13a | Describe the processes used to decide which studies were eligible for each synthesis (e.g. tabulating the study intervention characteristics and comparing against the planned groups for each synthesis (item #5)). |
| 13b | Describe any methods required to prepare the data for presentation or synthesis, such as handling of missing summary statistics, or data conversions. |
| 13c | Describe any methods used to tabulate or visually display results of individual studies and syntheses. |
| 13d | Describe any methods used to synthesize results and provide a rationale for the choice(s). If meta-analysis was performed, describe the model(s), method(s) to identify the presence and extent of statistical heterogeneity, and software package(s) used. |
| 13e | Describe any methods used to explore possible causes of heterogeneity among study results (e.g. subgroup analysis, meta-regression). |
| 13f | Describe any sensitivity analyses conducted to assess robustness of the synthesized results. |
| Reporting bias  assessment | 14 | Describe any methods used to assess risk of bias due to missing results in a synthesis (arising from reporting biases). |
| Certainty  assessment | 15 | Describe any methods used to assess certainty (or confidence) in the body of evidence for an outcome. |
| **RESULTS** | | |
| Study selection | 16a | Describe the results of the search and selection process, from the number of records identified in the search to the number of studies included in the review, ideally using a flow diagram. |
| 16b | Cite studies that might appear to meet the inclusion criteria, but which were excluded, and explain why they were excluded. |
| Study  characteristics | 17 | Cite each included study and present its characteristics. |
| Risk of bias in  studies | 18 | Present assessments of risk of bias for each included study. |

| Results of individual studies | 19 | For all outcomes, present, for each study: (a) summary statistics for each group (where appropriate) and (b) an effect estimate and its precision (e.g. confidence/credible interval), ideally using structured tables or plots. |
| --- | --- | --- |
| Results of  syntheses | 20a | For each synthesis, briefly summarise the characteristics and risk of bias among contributing studies. |
| 20b | Present results of all statistical syntheses conducted. If meta-analysis was done, present for each the summary estimate and its precision (e.g. confidence/credible interval) and measures of statistical heterogeneity. If comparing groups, describe the direction of the effect. |
| 20c | Present results of all investigations of possible causes of heterogeneity among study results. |
| 20d | Present results of all sensitivity analyses conducted to assess the robustness of the synthesized results. |
| Reporting biases | 21 | Present assessments of risk of bias due to missing results (arising from reporting biases) for each synthesis assessed. |
| Certainty of  evidence | 22 | Present assessments of certainty (or confidence) in the body of evidence for each outcome assessed. |
| **DISCUSSION** | | |
| Discussion | 23a | Provide a general interpretation of the results in the context of other evidence. |
| 23b | Discuss any limitations of the evidence included in the review. |
| 23c | Discuss any limitations of the review processes used. |
| 23d | Discuss implications of the results for practice, policy, and future research. |
| **OTHER INFORMATION** | | |
| Registration and protocol | 24a | Provide registration information for the review, including register name and registration number, or state that the review was not registered. |
| 24b | Indicate where the review protocol can be accessed, or state that a protocol was not prepared. |
| 24c | Describe and explain any amendments to information provided at registration or in the protocol. |
| Support | 25 | Describe sources of financial or non-financial support for the review, and the role of the funders or sponsors in the review. |
| Competing  interests | 26 | Declare any competing interests of review authors. |
| Availability of  data, code and  other materials | 27 | Report which of the following are publicly available and where they can be found: template data collection forms; data extracted from included studies; data used for all analyses; analytic code; any other materials used in the review. |

**Table S3** Overview of studies details

| **Reference number** | **Population characteristics** | **City/**  **Country** | **Phenomena**  **of interest** | **Methodological**  **approach** | **Data analysis**  **methods** | **Sports**  **type** | **Academic performances** |
| --- | --- | --- | --- | --- | --- | --- | --- |
| 48 | N=18 male high-level youth soccer players | Edinburgh  UK | Cognitive process and strategy used for problem solving | Semi-structured interviews; | Deductive CA | Soccer | 1.Players displayed a range of cognitive processes when solving problems, but metacognition were least employed. 2. Players exercised their knowledge of universal beliefs as a metacognitive process. 3. Metacognitive strategy was associated with two metacognitive processes: understanding how to approach learning and the impact of learning on task. |
| 49 | N=56,  FM=28 M=28  Mage=16.6 ± 0.4 | Sfax  Tunisia | Assessing the impact of VMEs on students’ self-regulated learning experiences | Semi-structured interviews | TA | Gymnastics | VMEs were able to empower the participating students to acquire motor skills and knowledge in PE classes through activating different metacognitive learning strategies. |
| 30 | N=16  A:11-18,  MA: 14.12±2.28 | UK | Implementing a PT program to improve decision-making and execution of skill among premier league academy soccer players | Semi-structured interviews | TA | Soccer | Players perceived PT, CB workshops and reflective diaries as having beneficial effects on confidence, meta-cognitive skills and challenge appraisals. |
| 14 | N=16,  FM=8 M=8  Mage=27.8 ± 0.4 | Lincoln  UK | To understand the self-regulatory processes facilitating optimal experiences in running. | Event-focused interview | TA and CA | Recreational distance running | When runners feel strenuous and unpleasant during running, they use active self-regulation strategies to control cognition and manage feelings of difficulty. |
| 52 | N=8 males | Glasgow UK | To construct a theoretical understanding of meta-attention in golfers. | A Grounded-  Theory | Grounded-Theory analyses | Golf | Meta-attention is metacognitive reflections of logistic and shot resources that facilitate attentional control. |
| 54 | N=18M  A:7-12 | Melbourne Australia | Explore the benefits of taekwondo for student learning, health and wellbeing. | A exploratory Case study | TA | Taekwondo | Taekwondo can promote self-discipline and self-motivation led to development of students’self-regulating abilities. |
| 51 | N=10,  FM=6, M=4  Mage=40.85 ± 8.16 | Coleraine, UK | Explore the metacognitive processes and attentional focus of recreational endurance runners. | Semi-structured interviews | Deductive and inductive CA | Endurance running | 1.Runners have relatively limited metacognitive skills and may not possess detailed knowledge of task-specific attentional strategies that regulate cognition. 2.Few runners do metacognitive planning or retrospectives on their own. 3.Cognitive strategies are developed empirically and are often the result of unpleasant, effort-related sensory experiences. 4. Experienced runners are an influential source of cognitive strategy acquisition. |
| 58 | N=4 four early childhood teachers | Oxford,  USA | Investigate teachers’ perceptions of yoga in a school setting. | Semi-structured interviews, observation,  classroom visits | TA | Yoga | Teachers believe yoga benefits include physical development, self-regulation skills and social-emotional skills, behavioral and cognitive benefits (take deep breaths to calm and relax the body, calmness) in the classroom. |
| 63 | N=15 with DCD  FM=2 M=13  Mage=8.05 ± 0.67 | Zagreb, Croatia | Compare the self-regulatory performance of children with and without DCD. | Observation | TA | CO-OP program from PACS | 1.Children with DCD exhibit less independent and more ineffective self-regulatory skill during motor learning. 2.Children with DCD rely more heavily on external support for effective regulation and are more likely to exhibit negative patterns of motivational regulation. |
| 57 | N=7 with LDs  FM=1 M=6  Mage=14 | Toronto, Canada | Using integra- mindfulness martial arts to address self-regulation challenges in youth with learning disabilities. | In-depth interviews | TA | MMA | 1.The development of mastery and pride was a common motivating factor for entering treatment. 2.The mindfulness component of MMA was identified as helpful in promoting a sense of calm, tolerance and acceptance of distress, and self-understanding in youth |
| 50 | N=10 elite-level endurance runners | Coleraine, UK | Exploring the dynamic control of attention and cognition in elite-level endurance runners from a metacognitive perspective | Semi-structured interviews | CA | Endurance running | Metacognitive strategies such as planning, monitoring, reviewing and evaluating, and metacognitive experiences (metacognitive feelings, metacognitive judgements and estimates) were fundamental to cognitive control and cognitive strategy use in elite endurance runners. |
| 56 | N=9 athletes | Mequon, USA | Examining the use of self-regulation strategies to enhance performance in MMA athletes | Observations, interviews | Hierarchical CA | MMA | The use of behavioral processes of change, development of embodied emotions, and the use of psychological strategies played a role in the self-regulation and performance of MMA fighters. |
| 59 | N=1 a male, international-level table tennis player | Victoria, Canada | Exploring the similarities and differences in self-regulated learning processes in sport and academics of a student-athlete. | Case study  Semi-structured,in-depth interviews, observation | A Case Study  methodology | Table tennis | The participant engaged all phases of regulation in sport and academics demonstrating the applicability of a model of self-regulated studying to sport training |
| 64 | N=1 male  A=16 | Florida, USA | Explore the experience of an adolescent male gamer as he develops his metacognition and self-scaffolding in MMORPGs. | observations, face-to-face interviews, document  analysis | TA | MMORPGs | 1. The interviewer uses self-talk to guide himself through the game.2. Metacognitive awareness functions very much like an online search engine.3 Self-awareness is extremely useful in helping learners recognize their own knowledge and keep track of their growth. |
| 62 | N=10 with DCD  FM=1 M=9  Mage=8.1 ± 0.7 | Zagreb, Croatia | Examining change in metacognitive performances  during motor learning | Observation  In-depth interviews | TA | CO-OP program | Children were often able to express task-specific knowledge, they failed to apply this knowledge during practice. Conversely, children were often able to demonstrate performance-based evidence for metacognitive control but were not able to make conscious reports of such skill following practice. |
| 53 | N=81 Mage=12.2-12.3 G；7 grade | Irvine,  USA | Evaluating Taekwondo implemented in public middle school PE. | Mixed methods | TA | Taekwondo | Taekwondo can develop students’ self-discipline, self-efficacy experience, self-control, concentrate and pay attention in PE. |
| 55 | N=9 athletes | Milwaukee USA | Understanding the self-regulation involved in training and competition in MMA. | Interview  observations | Grounded theory methodology | MMA | 1.Motivation and ongoing evaluation aided fighters to self-regulate both external and internal factors related to training and performance. 2.External factors associated with self-regulation consisted of the creation and maintenance of an ascetic routine through environmental regulation, social support, and structured amnesty. 3. Internal factors associated with self-regulation consisted of deliberately induced pain and distress, which facilitated self-efficacy, and produced stress and fatigue. |
| 47 | N=13 elite youth soccer players, Mage=16 ±0.6 N=6 male expert coaches Mage=37.2 ± 5.4 | Groningen, Netherlands | Examining behavioral correlates of self-regulation in elite youth soccer players. | Self-Regulation Scale Observation | CA | Soccer | Self-regulated learning involves taking responsibility for learning, and the player's practice environment plays an important role. |
| 60 | N=20 boys Mage=11.5 ± 0.55 | Ann Arbor, USA | Examine the domain specific self-regulatory skills of boys with DCD. | Observation | CA | Hockey | Boys with DCD had affective and planning differences in the hockey task, but only planning differences were evident in the solitaire task. |
| 61 | N=23 A:14-15 | Brest Cedex, France | Investigating the self-regulation components employed by students in a natural PE setting. | Clarification interview | Content Analysis | PE class | The students employed a 17-component self-regulation model while learning a new skill in the natural physical education |

ACTA: Applied Cognitive Task Analysis; VMEs: video modeling examples; PT:pressure training program; DCD: developmental coordination disorder; CO-OP program: Cognitive Orientation to daily Occupational Performance; PACS: the Paediatric Activity Card Sort; SR: self-regulation ;MAI: Martial Arts Inventory; MMA: Mindfulness Martial Arts; MC: Metacognition; VR: Virtual reality (VR) technology; DLVR teaching :deep learning-based VR-assisted teaching; DBH-CNN: deep Binary Hashed Convolutional Neural Network ;LP: learning passion; LDs: Learning Disabilities; MHC: Mental Health Challenges. M; male; FM: Female. TA: thematic analysis; CA:content analysis; MMORPGs: massively multiplayer online role-playing games.

**Table S4** Results of GRADE-CERQual approach for assessing confidence（N=20）

| **Reference number** | **Assessment** **of**  **methodological**  **limitations** | **Assessment** **of** **relevance** | **Assessment** **of** **coherence** | **Assessment** **of** **adequacy** | **Overall**  **CERQual** **rating** |
| --- | --- | --- | --- | --- | --- |
| 48 | Moderate concerns | Moderate  concerns | No or very minor  concerns | Minor  concerns | Moderate confidence |
| 49 | Moderate concerns | Moderate  concerns | No or very minor  concerns | Minor  concerns | Moderate confidence |
| 30 | Moderate concerns | Moderate  concerns | No or very minor  concerns | Minor  concerns | Moderate confidence |
| 14 | Moderate concerns | Moderate  concerns | No or very minor  concerns | Minor  concerns | Moderate confidence |
| 52 | Moderate concerns | Moderate  concerns | No or very minor  concerns | Minor  concerns | Moderate confidence |
| 54 | Moderate concerns | Moderate  concerns | No or very minor  concerns | Minor  concerns | Moderate confidence |
| 51 | Moderate concerns | Moderate  concerns | No or very minor  concerns | Minor  concerns | Moderate confidence |
| 58 | Moderate concerns | Moderate  concerns | No or very minor  concerns | Minor  concerns | Moderate confidence |
| 63 | Moderate concerns | Moderate  concerns | No or very minor  concerns | Minor  concerns | Moderate confidence |
| 57 | Moderate concerns | Moderate  concerns | No or very minor  concerns | Minor  concerns | Moderate confidence |
| 50 | Moderate concerns | Moderate  concerns | No or very minor  concerns | Minor  concerns | Moderate confidence |
| 56 | Moderate concerns | Moderate  concerns | No or very minor  concerns | Minor  concerns | Moderate confidence |
| 59 | Moderate concerns | Moderate  concerns | No or very minor  concerns | Minor  concerns | Moderate confidence |
| 64 | Moderate concerns | Moderate  concerns | No or very minor  concerns | Minor  concerns | Moderate confidence |
| 62 | Moderate concerns | Moderate  concerns | Minor  concerns | Minor  concerns | Moderate confidence |
| 53 | Moderate concerns | Moderate  concerns | No or very minor  concerns | Minor  concerns | Moderate confidence |
| 55 | Moderate concerns | Moderate  concerns | Minor  concerns | Minor  concerns | Moderate confidence |
| 47 | Moderate concerns | Moderate  concerns | Minor  concerns | Minor  concerns | Moderate confidence |
| 60 | Moderate concerns | Moderate  concerns | No or very minor  concerns | Minor  concerns | Moderate confidence |
| 61 | Moderate concerns | Moderate  concerns | No or very minor  concerns | Minor  concerns | Moderate confidence |
